# Supplementary material for: Cytotoxic Efficiency of Human CD8+ T Cell Memory Subtypes
Source: PubMed Central journal article supplement (PMC9043813; doi:10.3389/fimmu.2022.838484), 2022-04-13
Supplement: DataSheet_1.pdf [file DataSheet_1.pdf]

## Cytotoxic efficiency of human CD8<sup>+</sup> T cell memory subtypes

Arne Knörck, Gertrud Schäfer, Dalia Alansary, Josephine Richter, Lorenz Thurner, Markus Hoth, Eva C. Schwarz

### Supplementary Figures 1-3

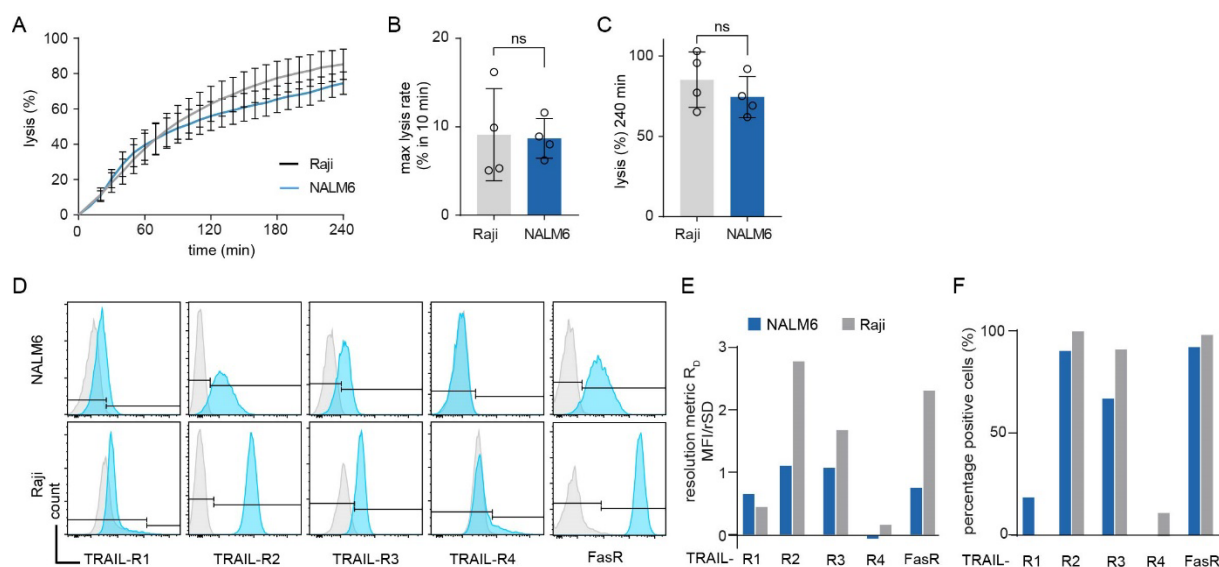

**Supplementary Figure 1: Comparison of Raji- and NALM6 target cell systems: SEA-mediated cytotoxicity and expression of FasR and TRAIL receptors 1-4.** A) Cytotoxicity of SEA-CTL against target cells Raji (grey) or NALM6 (blue) was analyzed by calcein-based real-time killing assay over 240 min. Effector to target ratio (E:T) was, n=4 donors, data are shown as mean +SD. Analysis of the maximal lysis rate (B) and end point target lysis after 240 min (C). D-F) FasR and TRAIL receptor 1-4 expression of Raji and NALM6 target cells was analyzed by flow cytometry (n=1). Quantification was done by determining the resolution metric (RD) value ( $MFI_{probe} - MFI_{IgGcontrol} / (rSD_{probe} + rSD_{IgGcontrol})$ ) (E). F) Proportion of TRAIL receptor 1-4 (R1-R4) and FasR positive cells. ns, no significant difference.

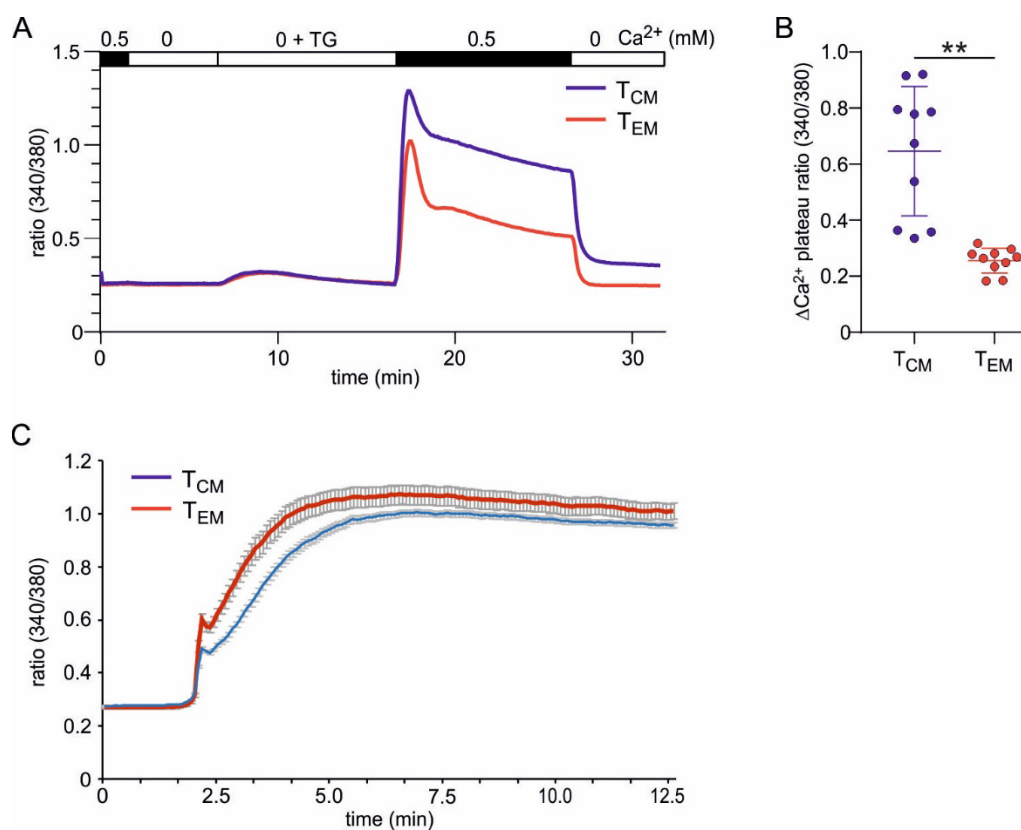

**Supplementary Figure 2: Ca<sup>2+</sup> signals in T<sub>CM</sub> and T<sub>EM</sub>.** A) Mean Ca<sup>2+</sup> traces of T<sub>CM</sub> and T<sub>EM</sub> subtypes after store depletion with thapsigargin (TG) using a Ca<sup>2+</sup> re-addition protocol. B) Ca<sup>2+</sup> plateau analyzed from 6 different donors (for each subtype) measured once or twice (n=10, 66-255 cells each measurement). Data are shown as mean±SD. C) Synchronized Ca<sup>2+</sup> influx of T<sub>CM</sub> and T<sub>EM</sub> after target cell contact (Raji cells). Data are shown as mean±SEM (n=1 donor, 67 (T<sub>EM</sub>) and 106 (T<sub>CM</sub>) cells). \*\* p<0.01.

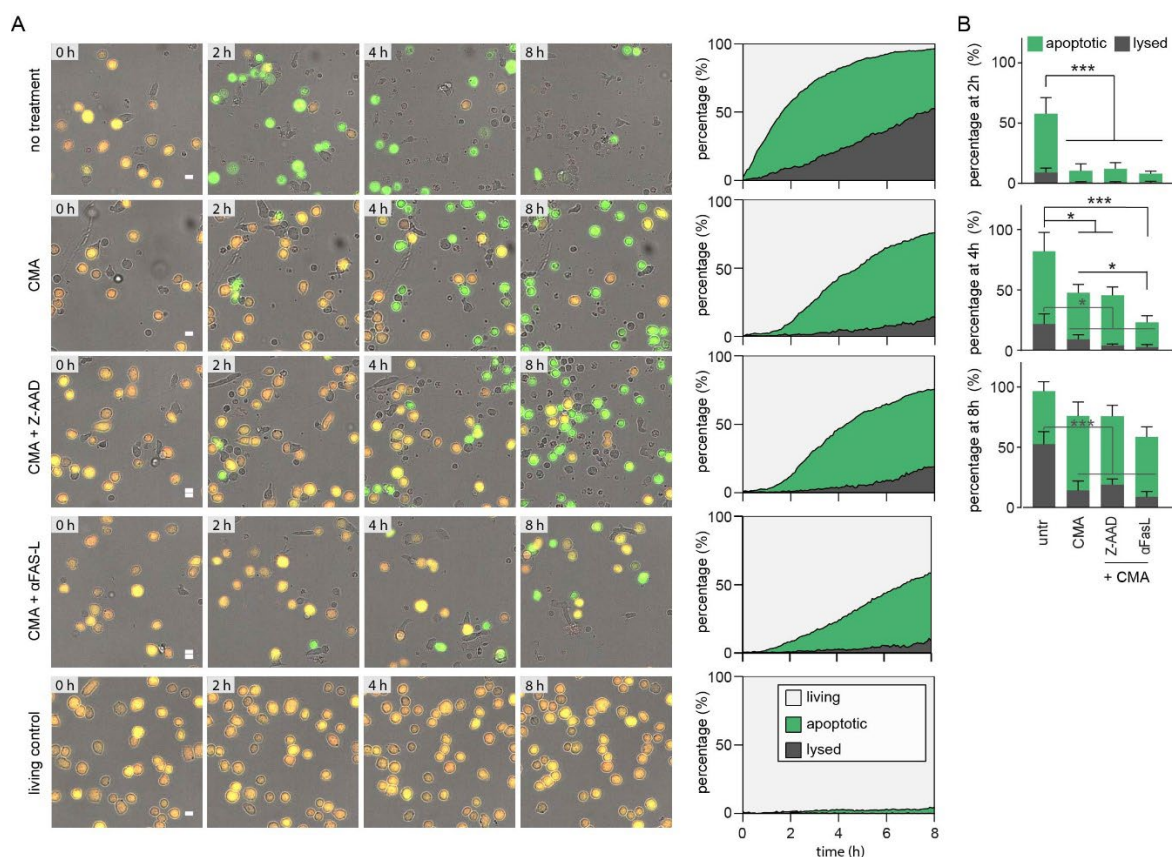

**Supplementary Figure 3: Dissecting killing mechanisms by blocking different killing pathways.** A) SEA-CTL mediated lysis of SEA-pulsed NALM6 pCasper-GR cells over 8h is quantified by semi-automated analysis and shown as a death plot. From top to bottom: no treatment (n=916 cells), effect of perforin inhibition by 50 nM CMA (n=1180 cells), effect of combined inhibition of perforin and granzyme B by 50 nM CMA + 20  $\mu$ M z-AAD-CMK (n=1055 cells), effect of combined inhibition of 50 nM CMA + anti-FasL (NOK-1 and NOK2, 10  $\mu$ g/ml each) (n=1158 cells), NALM6 pCasper target cells without CTL-SEA treated with all inhibitory treatments (living control) n=585. B) Quantification showing the percentage of apoptotic and necrotic/dead target cell at 2h, 4h and 8h. Statistical analysis was done using a two-way ANOVA test. Scale bars are 10  $\mu$ m. \*  $p < 0.05$ ; \*\*\*  $p > 0.001$ .
